# Supplementary material
Source: PubMed Central journal article supplement (PMC6834484)
Supplement: ajcr0009-2264-f9.pdf [file ajcr0009-2264-f9.pdf]

# KLK11 suppresses the proliferation of ESCC

**Table S1A.** Primer sequences of shRNAs for construction of stably-transfected cell lines

| Targets   | Sequences (5'-3')                                               |
|-----------|-----------------------------------------------------------------|
| ShKLK11#1 | F: GATCCCCGGTCTGTAACCAGTCTCTTTTCAAGAGA AAGAGACTGGTTACAGACCTTTTT |
| ShKLK11#2 | F: GATCCCCCAGTCTCTTCAAGGCATTTTCAAGAGA AATGCCTTGAAGAGACTGGTTTTT  |
| ShKLK11#3 | F: GATCCCCCAGTCTCTTCAAGGCATTTTCAAGAGA AATGCCTTGAAGAGACTGGTTTTT  |
| shNC      | F: GATCCCCGCCAGCTTAGCACTGACTCTTCAAGAGA GAGTCAGTGCTAAGCTGGCTTTTT |

**Table S1B.** Primers for RT-qPCR

| Primers   | Sequences (5'-3')         |
|-----------|---------------------------|
| KLK11     | F: AATCCTGCTTGCTCTGGC     |
|           | R: CGTGTGGAGGTCTTCTCTC    |
| GAPDH     | F: GGAGCGAGATCCCTCCAAAAT  |
|           | R: GGCTGTTGCATACTTCTCATGG |
| ki67      | F: AACTACCTGGACCGCTTCCT   |
|           | R: CCACTTGAGCTTGTTCACCA   |
| Cyclin D1 | F: GCTGCGAAGTGGAACCATC    |
|           | R: CCTCCTTCTGCACACATTTGAA |
| CDK6      | F: GCTGACCAGCAGTACGAATG   |
|           | R: GCACACATCAACAACCTGACC  |
| c-myc     | F: GGCTCCTGGCAAAGGTCA     |
|           | R: CTGCGTAGTTGTGCTGATG    |

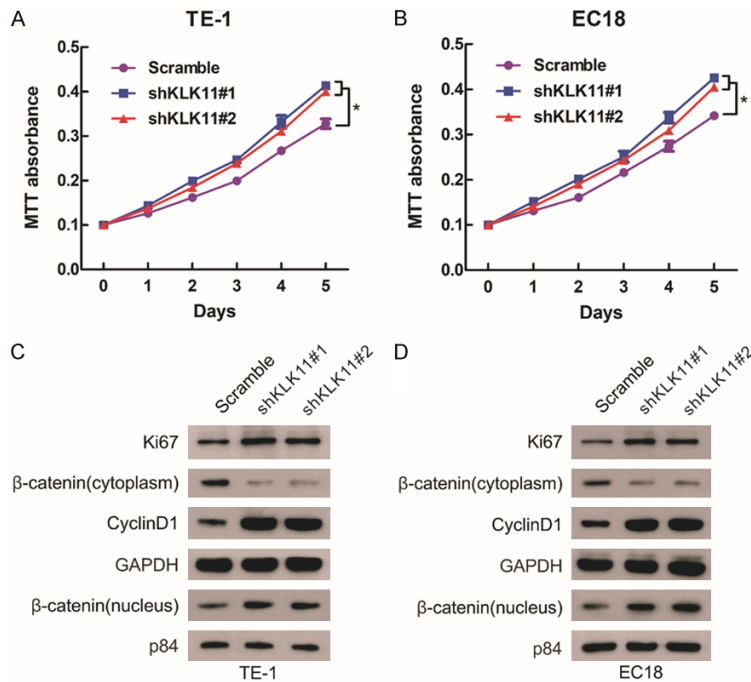

**Figure S1.** To detect the knockdown efficiency of shRNAs, shRNA#1 and shRNA#2 were selected for MTT assays and western blotting. A, B. Transfection of KLK11 shRNA#1 and shRNA#2, respectively, accelerated the proliferation of TE-1 and EC18 cells by MTT assays. C, D. Expression of Ki67, cyclin D1, β-catenin (cytosol), and β-catenin (nucleus) in TE-1 and EC18 cells transfected with shRNA#1 and shRNA#2 were determined.
